# Supplementary material
Source: PubMed Central journal article supplement (PMC3568759)
Supplement: NIHMS363998-supplement-01.pdf [file NIHMS363998-supplement-01.pdf]

Supporting Information for:

**Restraints on backbone conformations in solid state NMR studies of uniformly labeled proteins from quantitative amide  $^{15}\text{N}$ - $^{15}\text{N}$  and carbonyl  $^{13}\text{C}$ - $^{13}\text{C}$  dipolar recoupling data**

Kan-Nian Hu<sup>a</sup>, Wei Qiang<sup>a</sup>, Guillermo A. Bermejo<sup>b</sup>, Charles D. Schwieters<sup>b</sup>, and Robert Tycko<sup>a</sup>

<sup>a</sup>Laboratory of Chemical Physics, National Institute of Diabetes and Digestive and Kidney Diseases, National Institutes of Health, Bethesda, MD 20892-0520

<sup>b</sup>Division of Computational Bioscience, Center for Information Technology, National Institutes of Health, Bethesda, MD 20892-5624

Figures S1 and S2; Tables S1 and S2

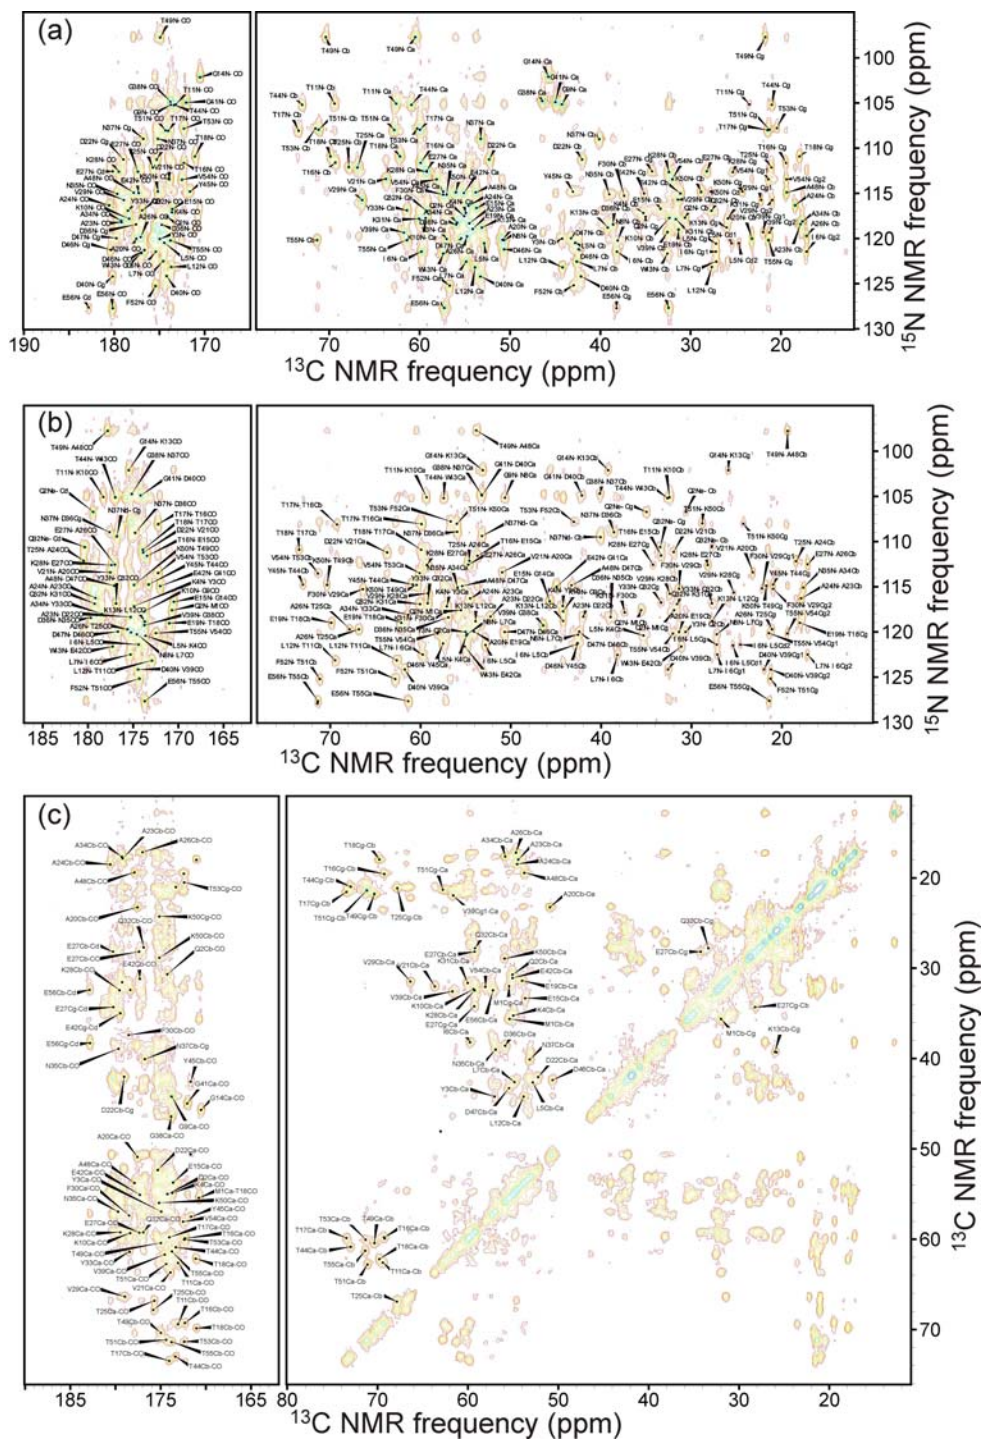

Figure S1: 2D NCACX (a), NCOCX (b), and CC (c) correlation spectra of microcrystalline, uniformly  $^{15}\text{N}$ ,  $^{13}\text{C}$ -labeled GB1, recorded at 17.6 T with MAS at 17.00 kHz. Assignments were obtained from these spectra using the MCASSIGN2 program [Hu *et al.*, J Biomolec. NMR **50**, 267-276 (2011)]. Assignments are listed in Table S1.

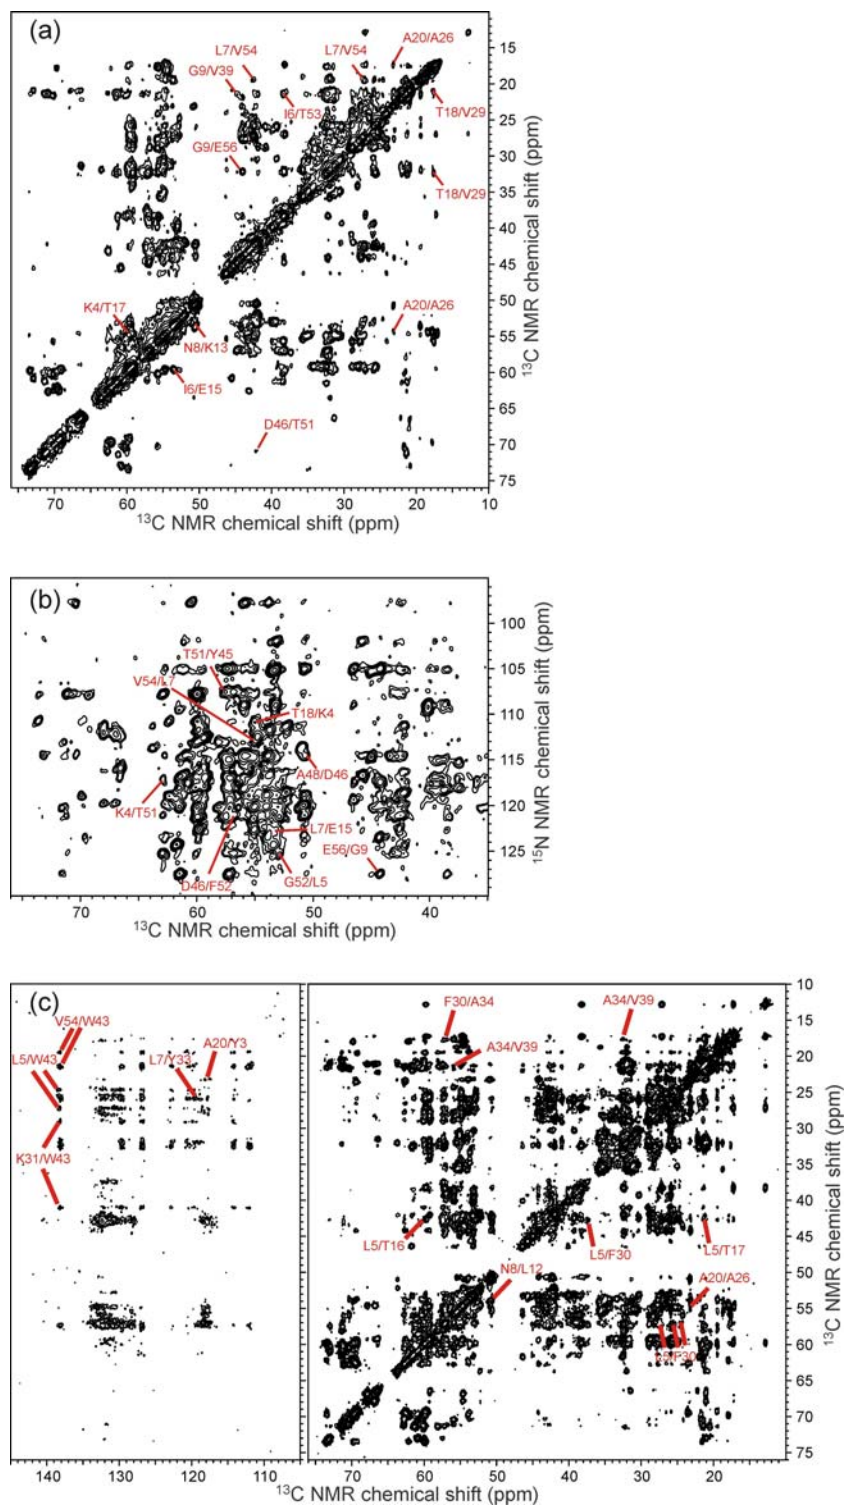

Figure S2: 2D CHHC (a), NHHC (b), and RAD (c) spectra of GB1, from which inter-residue distance restraints in Table S2 were obtained. These spectra were recorded at 17.6 T with MAS at 17.00 kHz.

Table S1: Site-specific chemical shift assignments and predicted backbone torsion angles for microcrystalline GB1. Assignments were generated in a semi-automated manner from spectral data in Fig. S1, using the program MCASSIGN2.  $^{13}\text{C}$  shifts are in ppm relative to DSS,  $^{15}\text{N}$  shifts are in ppm relative to liquid  $\text{NH}_3$ . Torsion angle predictions (in degrees) were generated by TALOS+. Only "good" predictions are shown. Predictions that were included in Xplor-NIH calculations are listed in bold font. Uncertainties were doubled in Xplor-NIH calculations. Torsion angles determined from atomic coordinates in PDB file 2GI9 are shown for comparison.

| residue type | $^{13}\text{C}\alpha$ shift | $^{13}\text{C}\beta$ shift | $^{13}\text{C}\gamma$ shift | $^{13}\text{C}\delta$ shift | backbone $^{15}\text{N}$ shift | sidechain $^{15}\text{N}$ shift | TALOS+ $\phi$ prediction | TALOS+ $\psi$ prediction        | $\phi, \psi$ in PDB 2GI9       |          |
|--------------|-----------------------------|----------------------------|-----------------------------|-----------------------------|--------------------------------|---------------------------------|--------------------------|---------------------------------|--------------------------------|----------|
| M1           | 170.7                       | 55.5                       | 35.6                        | 31.9                        |                                | 33.5                            |                          |                                 | ---,152                        |          |
| Q2           | 174.2                       | 55.0                       | 30.7                        | 35.0                        | 179.4                          | 117.6                           | 106.7                    | -135 $\pm$ 22                   | <b>147 <math>\pm</math> 14</b> | -94,127  |
| Y3           | 174.9                       | 57.0                       | 44.2                        |                             |                                | 120.0                           |                          | <b>-130 <math>\pm</math> 16</b> | <b>157 <math>\pm</math> 13</b> | -115,152 |
| K4           | 173.6                       | 54.9                       | 35.3                        |                             |                                | 117.1                           |                          | -152 $\pm$ 10                   | <b>150 <math>\pm</math> 9</b>  | -114,146 |
| L5           | 174.4                       | 52.8                       | 42.7                        | 27.2                        | 25.5, 24.6                     | 120.5                           |                          | <b>-117 <math>\pm</math> 16</b> | <b>133 <math>\pm</math> 17</b> | -122,125 |
| I6           | 175.3                       | 59.8                       | 38.2                        | 17.2, 27.2                  |                                | 121.4                           |                          |                                 |                                | -105,123 |
| L7           | 174.6                       | 54.9                       | 42.6                        | 27.2                        |                                | 122.5                           |                          |                                 |                                | -104,126 |
| N8           |                             | 50.7                       | 38.1                        |                             |                                | 120.2                           |                          | <b>-117 <math>\pm</math> 28</b> | 164 $\pm$ 26                   | -120,65  |
| G9           | 173.7                       | 44.2                       |                             |                             |                                | 105.2                           |                          |                                 |                                | -86,169  |
| K10          | 178.3                       | 59.3                       | 32.4                        |                             |                                | 117.7                           |                          | -61 $\pm$ 7                     | -34 $\pm$ 10                   | -62,-40  |
| T11          | 173.0                       | 62.6                       | 69.4                        | 23.5                        |                                | 105.1                           |                          | -105 $\pm$ 19                   | -2 $\pm$ 16                    | -107,-43 |
| L12          | 173.7                       | 53.9                       | 44.2                        | 27.7                        |                                | 123.2                           |                          | -128 $\pm$ 35                   | 153 $\pm$ 12                   | -111,125 |
| K13          | 175.5                       | 53.1                       | 39.2                        | 26.0                        |                                | 118.8                           |                          | <b>-134 <math>\pm</math> 13</b> | <b>158 <math>\pm</math> 16</b> | -133,148 |
| G14          | 170.5                       | 45.7                       |                             |                             |                                | 102.1                           |                          | -169 $\pm$ 28                   | 162 $\pm$ 11                   | 144,-153 |
| E15          | 173.5                       | 53.7                       | 33.3                        |                             |                                | 116.7                           |                          | <b>-143 <math>\pm</math> 17</b> | <b>160 <math>\pm</math> 0</b>  | -139,140 |
| T16          | 172.3                       | 59.9                       | 69.3                        | 19.5                        |                                | 111.6                           |                          | <b>-125 <math>\pm</math> 31</b> | <b>153 <math>\pm</math> 14</b> | -139,171 |
| T17          | 174.0                       | 59.9                       | 73.4                        | 21.5                        |                                | 108.0                           |                          | <b>-126 <math>\pm</math> 19</b> | <b>162 <math>\pm</math> 6</b>  | -135,162 |
| T18          | 171.0                       | 62.2                       | 69.8                        | 18.0                        |                                | 110.9                           |                          |                                 |                                | -153,162 |
| E19          |                             | 54.1                       | 31.4                        |                             |                                | 119.0                           |                          | <b>-135 <math>\pm</math> 23</b> | 156 $\pm$ 14                   | -111,128 |
| A20          | 177.5                       | 50.9                       | 23.2                        |                             |                                | 120.0                           |                          | -132 $\pm$ 35                   | 167 $\pm$ 15                   | -150,156 |
| V21          | 173.9                       | 63.7                       | 32.0                        |                             |                                | 113.4                           |                          | -84 $\pm$ 28                    | -20 $\pm$ 23                   | -67,-31  |
| D22          | 175.3                       | 52.3                       | 42.0                        | 179.0                       |                                | 111.2                           |                          |                                 |                                | -156,177 |
| A23          | 179.2                       | 54.5                       | 17.9                        |                             |                                | 118.3                           |                          |                                 |                                | -70,-39  |
| A24          | 180.5                       | 54.6                       | 18.5                        |                             |                                | 116.3                           |                          | <b>-64 <math>\pm</math> 6</b>   | <b>-38 <math>\pm</math> 7</b>  | -61,-37  |
| T25          | 175.7                       | 66.8                       | 67.8                        | 21.1                        |                                | 112.1                           |                          | <b>-67 <math>\pm</math> 9</b>   | <b>-38 <math>\pm</math> 13</b> | -67,-47  |
| A26          | 177.0                       | 54.7                       | 17.2                        |                             |                                | 119.7                           |                          | <b>-64 <math>\pm</math> 6</b>   | <b>-40 <math>\pm</math> 14</b> | -60,-40  |
| E27          | 177.4                       | 59.3                       | 28.2                        | 34.3                        | 180.2                          | 112.5                           |                          | <b>-65 <math>\pm</math> 10</b>  | <b>-40 <math>\pm</math> 13</b> | -58,-43  |
| K28          | 179.5                       | 59.2                       | 32.4                        | 25.3                        |                                | 112.6                           |                          | <b>-67 <math>\pm</math> 9</b>   | <b>-45 <math>\pm</math> 9</b>  | -62,-42  |
| V29          | 178.9                       | 66.4                       | 31.4                        | 21.0, 22.2                  |                                | 115.7                           |                          | <b>-69 <math>\pm</math> 10</b>  | <b>-40 <math>\pm</math> 9</b>  | -63,-48  |
| F30          | 178.5                       | 57.3                       | 37.4                        |                             |                                | 115.2                           |                          | <b>-69 <math>\pm</math> 9</b>   | <b>-38 <math>\pm</math> 12</b> | -68,-36  |
| K31          | 179.3                       | 60.0                       | 31.6                        | 25.9                        |                                | 117.8                           |                          | <b>-69 <math>\pm</math> 9</b>   | <b>-38 <math>\pm</math> 11</b> | -65,-38  |
| Q32          | 176.9                       | 59.2                       | 27.7                        | 33.4                        | 180.4                          | 116.9                           | 110.6                    | <b>-63 <math>\pm</math> 5</b>   | <b>-45 <math>\pm</math> 4</b>  | -64,-41  |
| Y33          | 178.4                       | 61.4                       |                             |                             |                                | 116.8                           |                          | <b>-62 <math>\pm</math> 6</b>   | <b>-44 <math>\pm</math> 7</b>  | -59,-46  |
| A34          | 179.3                       | 55.9                       | 17.6                        |                             |                                | 118.1                           |                          | <b>-61 <math>\pm</math> 6</b>   | <b>-39 <math>\pm</math> 6</b>  | -63,-46  |
| N35          | 179.7                       | 57.0                       | 39.0                        |                             |                                | 115.1                           |                          | <b>-62 <math>\pm</math> 4</b>   | <b>-41 <math>\pm</math> 6</b>  | -60,-45  |
| D36          | 174.8                       | 55.9                       | 38.6                        | 177.6                       |                                | 118.4                           |                          | <b>-66 <math>\pm</math> 9</b>   | <b>-29 <math>\pm</math> 13</b> | -63,-46  |
| N37          | 175.2                       | 53.2                       | 40.1                        | 176.8                       |                                | 109.0                           | 109.4                    | -91 $\pm$ 11                    | 1 $\pm$ 14                     | -103,12  |
| G38          | 173.8                       | 46.4                       |                             |                             |                                | 104.8                           |                          | 85 $\pm$ 23                     | 15 $\pm$ 11                    | 86,10    |
| V39          | 174.5                       | 61.7                       | 32.6                        | 21.2, 22.0                  |                                | 119.3                           |                          | -104 $\pm$ 14                   | 126 $\pm$ 24                   | -97,134  |

|     |       |      |      |            |       |       |  |                  |                 |           |
|-----|-------|------|------|------------|-------|-------|--|------------------|-----------------|-----------|
| D40 | 174.2 | 53.2 | 42.1 | 180.2      |       | 124.2 |  | -107 ± 25        | 151 ± 34        | -140,111  |
| G41 | 172.0 | 45.0 |      |            |       | 104.9 |  |                  |                 | -156,-164 |
| E42 | 177.3 | 55.1 | 31.1 | 35.1       | 179.5 | 115.0 |  | <b>-114 ± 25</b> | <b>140 ± 13</b> | -96,140   |
| W43 | 177.0 | 57.4 | 32.6 |            |       | 121.6 |  |                  |                 | -113,147  |
| T44 | 173.3 | 60.9 | 73.0 | 21.0       |       | 105.2 |  | <b>-135 ± 24</b> | <b>161 ± 14</b> | -131,159  |
| Y45 | 171.6 | 57.5 | 42.7 |            |       | 114.8 |  | <b>-149 ± 7</b>  | <b>152 ± 14</b> | -136,130  |
| D46 | 176.7 | 50.7 | 42.4 | 180.4      |       | 121.2 |  |                  |                 | -119,104  |
| D47 | 177.1 | 55.4 | 43.3 | 179.8      |       | 120.0 |  | -64 ± 8          | -28 ± 13        | -62,-25   |
| A48 | 177.9 | 53.8 | 19.4 |            |       | 114.9 |  | -71 ± 16         | -28 ± 14        | -71,-16   |
| T49 | 174.9 | 60.4 | 70.4 | 21.7       |       | 97.7  |  | -108 ± 11        | 1 ± 21          | -126,8    |
| K50 | 175.2 | 56.0 | 28.9 | 24.3       | 27.8  | 114.8 |  | 61 ± 7           | 34 ± 11         | 53,40     |
| T51 | 174.3 | 62.8 | 71.1 | 21.3       |       | 108.0 |  |                  |                 | -123,129  |
| F52 | 175.4 | 56.6 | 43.0 |            |       | 125.2 |  | <b>-102 ± 20</b> | <b>152 ± 14</b> | -99,152   |
| T53 | 172.3 | 60.1 | 71.4 | 20.5       |       | 107.8 |  | <b>-143 ± 23</b> | <b>157 ± 13</b> | -129,149  |
| V54 | 172.5 | 58.1 | 32.1 | 19.4, 21.4 |       | 113.5 |  | <b>-122 ± 24</b> | <b>145 ± 14</b> | -131,131  |
| T55 | 173.7 | 61.3 | 71.4 | 21.4       |       | 120.2 |  | <b>-112 ± 18</b> | <b>131 ± 17</b> | -133,129  |
| E56 | 180.2 | 57.2 | 32.4 | 38.2       | 182.8 | 127.7 |  |                  |                 | -97,---   |

Table S2: Interatomic distance restraints derived from inter-residue crosspeaks in 2D CHHC, NHHC, and RAD spectra of microcrystalline GB1 in Fig. S2, and from  $^{15}\text{N}$ -BARE and  $^{13}\text{C}$ -BARE data for N- and C-terminal residues. (Note: If atom 1 and/or atom 2 can represent more than one site, *e.g.*, the three  $\text{H}_\beta$  sites of A20, then distance restraints for all possible combinations of atom 1 and atom 2 were included in the Xplor-NIH calculations.)

| atom 1                   | atom 2                   | distance range (Å) | 2D spectrum           |
|--------------------------|--------------------------|--------------------|-----------------------|
| I6 $\text{H}_\alpha$     | E15 $\text{H}_\alpha$    | 1.8-2.8            | CHHC                  |
| N8 $\text{H}_\alpha$     | K13 $\text{H}_\alpha$    | 1.8-2.8            | CHHC                  |
| K4 $\text{H}_\alpha$     | T17 $\text{H}_\alpha$    | 1.8-2.8            | CHHC                  |
| L12 $\text{H}_\delta$    | N37 $\text{H}_\beta$     | 1.8-2.8            | CHHC                  |
| T18 $\text{H}_\gamma$    | V29 $\text{H}_\beta$     | 1.8-2.8            | CHHC                  |
| T18 $\text{H}_\gamma$    | V29 $\text{H}_\gamma$    | 1.8-2.8            | CHHC                  |
| A20 $\text{H}_\beta$     | A26 $\text{H}_\alpha$    | 1.8-2.8            | CHHC                  |
| A20 $\text{H}_\beta$     | A26 $\text{H}_\beta$     | 1.8-2.8            | CHHC                  |
| G9 $\text{H}_\alpha$     | V39 $\text{H}_\gamma$    | 1.8-2.8            | CHHC                  |
| E42 $\text{H}_\beta$     | T55 $\text{H}_\beta$     | 1.8-2.8            | CHHC                  |
| D46 $\text{H}_\beta$     | T51 $\text{H}_\beta$     | 1.8-2.8            | CHHC                  |
| I6 $\text{H}_\beta$      | T53 $\text{H}_\gamma$    | 1.8-2.8            | CHHC                  |
| L7 $\text{H}_\beta$      | V54 $\text{H}_\gamma$    | 1.8-2.8            | CHHC                  |
| L7 $\text{H}_\gamma$     | V54 $\text{H}_\gamma$    | 1.8-2.8            | CHHC                  |
| G9 $\text{H}_\alpha$     | E56 $\text{H}_\beta$     | 1.8-2.8            | CHHC                  |
| K4 $\text{H}_\text{N}$   | T51 $\text{H}_\alpha$    | 2.0-4.0            | NHHC                  |
| L5 $\text{H}_\alpha$     | F52 $\text{H}_\text{N}$  | 2.0-4.0            | NHHC                  |
| L7 $\text{H}_\alpha$     | E54 $\text{H}_\text{N}$  | 2.0-4.0            | NHHC                  |
| G9 $\text{H}_\alpha$     | E56 $\text{H}_\text{N}$  | 2.0-4.0            | NHHC                  |
| L7 $\text{H}_\text{N}$   | E15 $\text{H}_\alpha$    | 2.0-4.0            | NHHC                  |
| K4 $\text{H}_\alpha$     | T18 $\text{H}_\text{N}$  | 2.0-4.0            | NHHC                  |
| D46 $\text{H}_\alpha$    | A48 $\text{H}_\text{N}$  | 2.0-4.0            | NHHC                  |
| D46 $\text{H}_\text{N}$  | F52 $\text{H}_\alpha$    | 2.0-4.0            | NHHC                  |
| Y45 $\text{H}_\alpha$    | T51 $\text{H}_\text{N}$  | 2.0-4.0            | NHHC                  |
| L5 $\text{C}_\delta$     | F30 $\text{C}_\alpha$    | 3.0-7.0            | RAD                   |
| L5 $\text{C}_\delta$     | W43 $\text{C}_{\beta 2}$ | 3.0-7.0            | RAD                   |
| L5 $\text{C}_\gamma$     | F30 $\text{C}_\alpha$    | 3.0-7.0            | RAD                   |
| L5 $\text{C}_\gamma$     | W43 $\text{C}_{\beta 2}$ | 3.0-7.0            | RAD                   |
| L7 $\text{C}_\delta$     | Y33 $\text{C}_\zeta$     | 3.0-7.0            | RAD                   |
| N8 $\text{C}_\alpha$     | L12 $\text{C}_\alpha$    | 3.0-7.0            | RAD                   |
| L5 $\text{C}_\beta$      | T16 $\text{C}_\alpha$    | 3.0-7.0            | RAD                   |
| L5 $\text{C}_\beta$      | T17 $\text{C}_\gamma$    | 3.0-7.0            | RAD                   |
| Y3 $\text{C}_\zeta$      | A20 $\text{C}_\beta$     | 3.0-7.0            | RAD                   |
| A20 $\text{C}_\beta$     | A26 $\text{C}_\alpha$    | 3.0-7.0            | RAD                   |
| L5 $\text{C}_\beta$      | F30 $\text{C}_\beta$     | 3.0-7.0            | RAD                   |
| K31 $\text{C}_\beta$     | W43 $\text{C}_{\beta 2}$ | 3.0-7.0            | RAD                   |
| K31 $\text{C}_\delta$    | W43 $\text{C}_{\beta 2}$ | 3.0-7.0            | RAD                   |
| K31 $\text{C}_\gamma$    | W43 $\text{C}_{\beta 2}$ | 3.0-7.0            | RAD                   |
| F30 $\text{C}_\alpha$    | A34 $\text{C}_\beta$     | 3.0-7.0            | RAD                   |
| A34 $\text{C}_\beta$     | V39 $\text{C}_\beta$     | 3.0-7.0            | RAD                   |
| Y45 $\text{C}_\zeta$     | D47 $\text{C}_\beta$     | 3.0-7.0            | RAD                   |
| W43 $\text{C}_{\beta 2}$ | V54 $\text{C}_\gamma$    | 3.0-7.0            | RAD                   |
| M1 N                     | Q2 N                     | 3.1-3.5            | $^{15}\text{N}$ -BARE |
| T55 N                    | E56 N                    | 3.1-3.3            | $^{15}\text{N}$ -BARE |
| M1 CO                    | Q2 CO                    | 3.0-3.2            | $^{13}\text{C}$ -BARE |
| T55 CO                   | E56 CO                   | 2.9-3.1            | $^{13}\text{C}$ -BARE |
